# Supplementary material for: Cell Metabolomics Reveals the Potential Mechanism of Aloe Emodin and Emodin Inhibiting Breast Cancer Metastasis
Source: MDPI journal article supplement (doi:10.3390/ijms232213738), 2022-11-08
Supplement: s1 [file s1]

**Table S1.** Identification of biomarkers between culture alone and co-culture MCF-7 cells.

| Mode | Metabolites                | RT (min) | Measured mass (Da) | Mass error (ppm) | Fragment ion (m/z)                                    |
|------|----------------------------|----------|--------------------|------------------|-------------------------------------------------------|
| ESI+ | Arginine                   | 0.65     | 174.1128           | 6.3              | 158, 130, 116, 112, 70, 60                            |
|      | Methionine                 | 1.12     | 150.0589           | 0.0              | 133, 104, 102, 87, 61, 56                             |
|      | Glutathione                | 1.39     | 308.0916           | 0.0              | 290, 233, 179, 162, 144, 130, 116, 76                 |
|      | 2-Phenylglycine            | 2.16     | 152.0700           | 4.8              | 134, 106, 79                                          |
|      | Pyridoxine                 | 2.16     | 170.0825           | 4.7              | 152, 134, 124, 106                                    |
|      | Adenine                    | 1.26     | 136.0630           | 5.1              | 119, 109, 94                                          |
|      | ADP                        | 4.47     | 428.0375           | 0.7              | 348, 136                                              |
|      | Oxidized glutathione       | 4.47     | 613.1589           | -1.5             | 595, 538, 484, 409, 355                               |
|      | Indoleacrylic acid         | 5.29     | 188.0723           | 5.8              | 170, 146, 118                                         |
|      | 1H-Indole-3-carboxaldehyde | 5.29     | 146.0614           | 5.5              | 118, 91                                               |
| ESI- | Guanine                    | 4.70     | 152.0580           | 5.3              | 135, 110                                              |
|      | Glutamic acid              | 0.73     | 146.0455           | 1.4              | 128, 102, 84                                          |
|      | Tyrosine                   | 2.49     | 180.0662           | 0.6              | 163, 136, 119, 93                                     |
|      | Xanthine                   | 2.49     | 151.0257           | 0.7              | 133, 108                                              |
|      | Glutathione                | 1.39     | 306.0759           | -0.3             | 288, 272, 254, 210, 197, 179, 143, 128                |
|      | Oxidized glutathione       | 4.47     | 611.1439           | -0.3             | 593, 567, 482, 306, 288, 272, 258, 242, 177, 160, 128 |
|      | Phenylalanine              | 4.62     | 164.0720           | 4.8              | 147, 103, 92, 72                                      |
|      | Hypoxanthine               | 1.93     | 135.0308           | 0.7              | 108, 92, 65                                           |
|      | Pantothenic acid           | 4.96     | 218.1029           | 0.5              | 146, 88, 71                                           |
|      | S-Adenosylhomocysteine     | 4.47     | 383.1134           | -1.0             | 134, 107                                              |
|      | N-Formyl-L-glutamic acid   | 1.26     | 174.0402           | 0.0              | 146, 130, 102, 86                                     |
|      | Inosine                    | 4.62     | 267.0735           | 2.2              | 135, 108, 92                                          |
|      | Citric acid                | 1.72     | 191.0192           | 0.0              | 173, 129, 111, 102, 87, 85                            |
|      | Guanosine                  | 4.62     | 282.0839           | 0.4              | 150, 133, 108                                         |
|      | Tryptophan                 | 5.29     | 203.0820           | -0.5             | 186, 159, 142, 130, 116, 74                           |
|      | Malic acid                 | 0.88     | 133.0130           | -5.3             | 115, 89, 71                                           |
|      | Cytosine                   | 0.88     | 110.0356           | 1.8              | 67, 42                                                |

**Table S2.** Multiple reaction monitoring (MRM) parameters for metabolites.

| Analytes                | Adduct Ion           | MRM transition<br>(m/z) | Q1 Pre<br>deviation (V) | CE<br>(V) | Q3 Pre<br>deviation (V) |
|-------------------------|----------------------|-------------------------|-------------------------|-----------|-------------------------|
| Methionine              | [M + H] <sup>+</sup> | 150.00 > 56.05          | -20                     | -17       | -20                     |
|                         |                      | 150.00 > 104.10         | -26                     | -13       | -20                     |
| SAM                     | [M-H] <sup>-</sup>   | 398.95 > 96.80          | 12                      | 35        | 13                      |
|                         |                      | 398.95 > 171.20         | 28                      | 31        | 16                      |
| SAH                     | [M + H] <sup>+</sup> | 385.10 > 136.05         | -14                     | -20       | -24                     |
|                         |                      | 385.10 > 134.10         | -14                     | -20       | -28                     |
| Homocysteine            | [M + H] <sup>+</sup> | 136.00 > 90.15          | -29                     | -12       | -17                     |
|                         |                      | 136.00 > 56.15          | -22                     | -18       | -22                     |
| Cysteine                | [M + H] <sup>+</sup> | 122.05 > 59.10          | -30                     | -23       | -22                     |
|                         |                      | 122.05 > 76.10          | -30                     | -15       | -29                     |
| Glutathione             | [M-H] <sup>-</sup>   | 306.10 > 272.20         | 15                      | 13        | 28                      |
|                         |                      | 306.10 > 143.20         | 15                      | 19        | 14                      |
| Oxidized<br>glutathione | [M-H] <sup>-</sup>   | 611.10 > 306.20         | 28                      | 25        | 21                      |
|                         |                      | 611.10 > 272.25         | 28                      | 29        | 17                      |
| Glutamate               | [M + H] <sup>+</sup> | 148.05 > 84.15          | -17                     | -16       | -20                     |
|                         |                      | 148.05 > 56.15          | -10                     | -27       | -22                     |
| Glutamine               | [M + H] <sup>+</sup> | 147.05 > 84.05          | -20                     | -20       | -20                     |
|                         |                      | 147.05 > 130.00         | -20                     | -15       | -20                     |
| Fumarate                | [M-H] <sup>-</sup>   | 115.25 > 71.00          | 13                      | 12        | 12                      |
|                         |                      | 115.25 > 27.10          | 13                      | 11        | 10                      |
| Malate                  | [M-H] <sup>-</sup>   | 133.20 > 115.05         | 27                      | 16        | 11                      |
|                         |                      | 133.20 > 71.00          | 27                      | 16        | 10                      |
| Succinate               | [M-H] <sup>-</sup>   | 117.20 > 73.10          | 25                      | 14        | 11                      |
|                         |                      | 117.20 > 99.90          | 13                      | 24        | 15                      |
| Citrate                 | [M-H] <sup>-</sup>   | 191.10 > 111.05         | 15                      | 13        | 10                      |
|                         |                      | 191.10 > 87.05          | 21                      | 21        | 13                      |
| $\alpha$ -Ketoglutarate | [M-H] <sup>-</sup>   | 145.10 > 101.10         | 15                      | 12        | 10                      |
|                         |                      | 145.10 > 57.05          | 15                      | 13        | 22                      |
| Aspartate               | [M + H] <sup>+</sup> | 134.10 > 74.10          | -22                     | -15       | -29                     |
|                         |                      | 134.10 > 88.15          | -22                     | -12       | -16                     |
| Inosine                 | [M + H] <sup>+</sup> | 269.05 > 137.05         | -20                     | -10       | -20                     |
|                         |                      | 269.05 > 119.15         | -10                     | -38       | -22                     |
| Hypoxanthine            | [M + H] <sup>+</sup> | 137.10 > 119.15         | -20                     | -22       | -12                     |
|                         |                      | 137.10 > 55.05          | -21                     | -30       | -21                     |
| Xanthosine              | [M + H] <sup>+</sup> | 285.05 > 153.05         | -20                     | -11       | -20                     |
|                         |                      | 285.05 > 136.00         | -13                     | -29       | -14                     |
| Xanthine                | [M + H] <sup>+</sup> | 153.00 > 71.20          | -11                     | -19       | -29                     |
|                         |                      | 153.00 > 91.65          | -16                     | -13       | -22                     |
| Guanosine               | [M + H] <sup>+</sup> | 284.05 > 152.10         | -20                     | -20       | -20                     |
|                         |                      | 284.05 > 135.15         | -10                     | -35       | -14                     |

|                        |                      |                 |     |     |     |
|------------------------|----------------------|-----------------|-----|-----|-----|
| Tryptophan             | [M + H] <sup>+</sup> | 205.15 > 188.05 | -20 | -10 | -20 |
|                        |                      | 205.15 > 118.00 | -20 | -25 | -20 |
| Pyridoxal-5'-phosphate | [M + H] <sup>+</sup> | 247.95 > 150.10 | -20 | -16 | -20 |
|                        |                      | 247.95 > 94.20  | -18 | -28 | -19 |
| N, N-Phe               | [M + H] <sup>+</sup> | 194.25 > 148.10 | -20 | -15 | -20 |
|                        |                      | 194.25 > 133.05 | -20 | -25 | -20 |

**Table S3.** Regression equation, correlation coefficient and linear range of metabolites.

| Analytes             | Linear equation         | R <sup>2</sup> | Dynamic range (ng/mL) |
|----------------------|-------------------------|----------------|-----------------------|
| Methionine           | y = 1.0517x-0.0497      | 0.9918         | 0.2–4000              |
| SAH                  | y = 0.0135x + 0.0007    | 0.9992         | 4–8000                |
| Homocysteine         | y = 0.5600x – 0.0232    | 0.9941         | 2–4000                |
| Cysteine             | y = 0.0158x – 0.0036    | 0.9915         | 40–4000               |
| Glutathione          | y = 199.044x + 7396.65  | 0.9990         | 20–10,000             |
| Oxidized glutathione | y = 619.718x-8882.17    | 0.9996         | 8–8000                |
| Glutamate            | y = 0.0187x + 0.0055    | 0.9921         | 4–8000                |
| Fumarate             | y = 22.7573x + 12,372.3 | 0.9971         | 40–10,000             |
| Malate               | y = 810.787x + 20,233.0 | 0.9997         | 4–10,000              |
| Succinate            | y = 88.6555x + 4942.38  | 0.9950         | 40–8000               |
| Citrate              | y = 465.964x + 16147.2  | 0.9980         | 0.4–40,000            |
| α-Ketoglutarate      | y = 214.708x + 4383.15  | 0.9908         | 200–10,000            |
| Inosine              | y = 0.0802x + 0.0009    | 0.9998         | 0.1–4000              |
| Hypoxanthine         | y = 0.0298x – 0.0034    | 0.9972         | 10–10,000             |
| Xanthosine           | y = 0.1839x + 0.0061    | 0.9991         | 0.1–10,000            |
| Xanthine             | y = 183.257x – 19,362.2 | 0.9946         | 10–10,000             |
| Guanosine            | y = 0.0984x – 0.0017    | 0.9992         | 0.1–10,000            |
| Tryptophan           | y = 0.5269x-0.0076      | 0.9997         | 0.01–8000             |

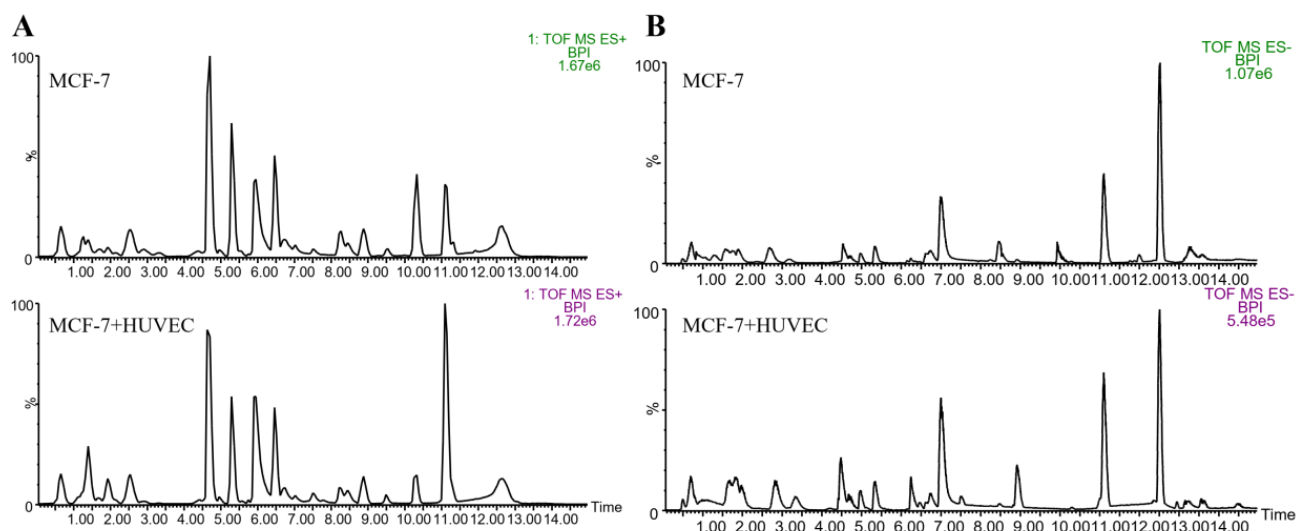

**Figure S1.** Extracted ion chromatograms of polar metabolites of culture alone and co-culture MCF-7 cells in positive (A) and negative(B) ion modes.

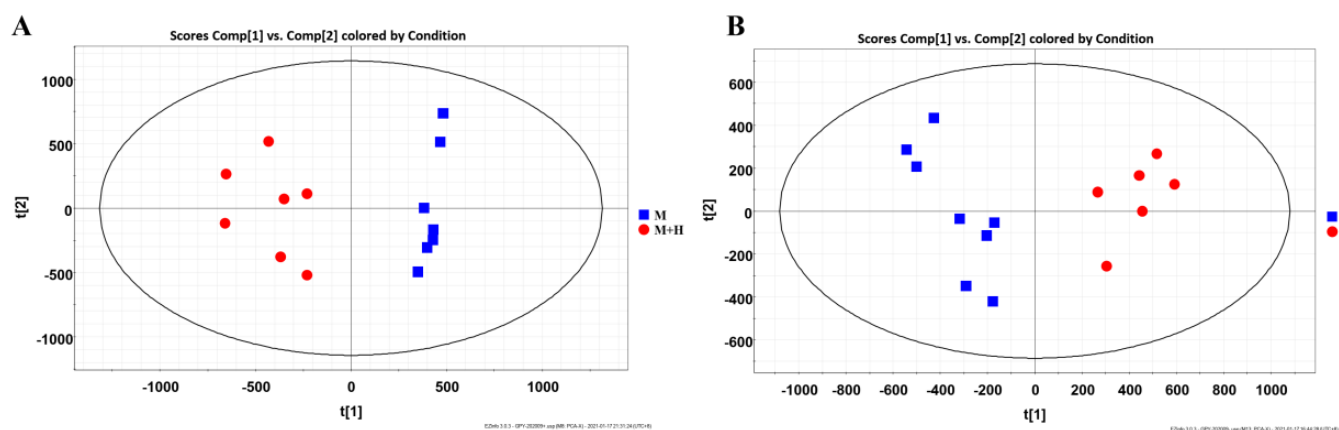

**Figure S2.** PCA score plots of polar metabolites of MCF-7 cells in positive (A) and negative (B) ion modes.

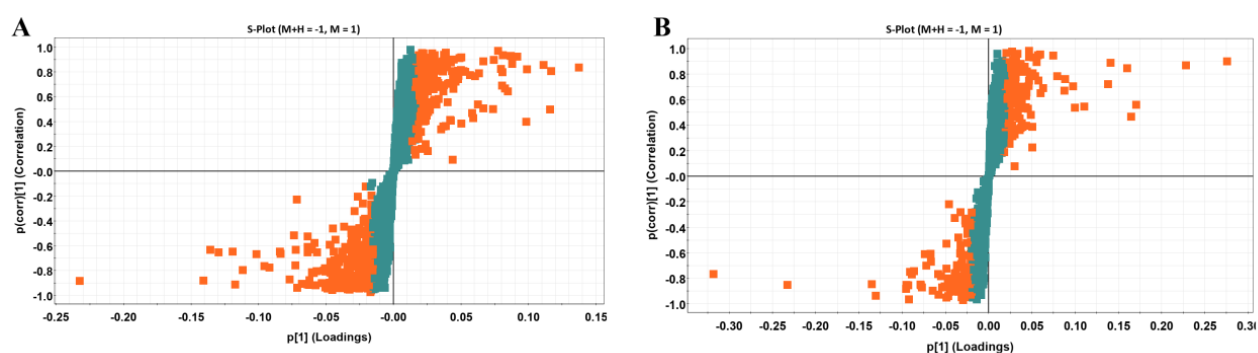

**Figure S3.** S-plots obtained by OPLS-DA analysis of polar metabolites between culture alone and co-culture MCF-7 cells in positive (A) and negative (B) ion modes.

**Figure S4.** Gene-enzyme-biomarker network built by Cytoscape of potential biomarkers which were filtered out in this study.

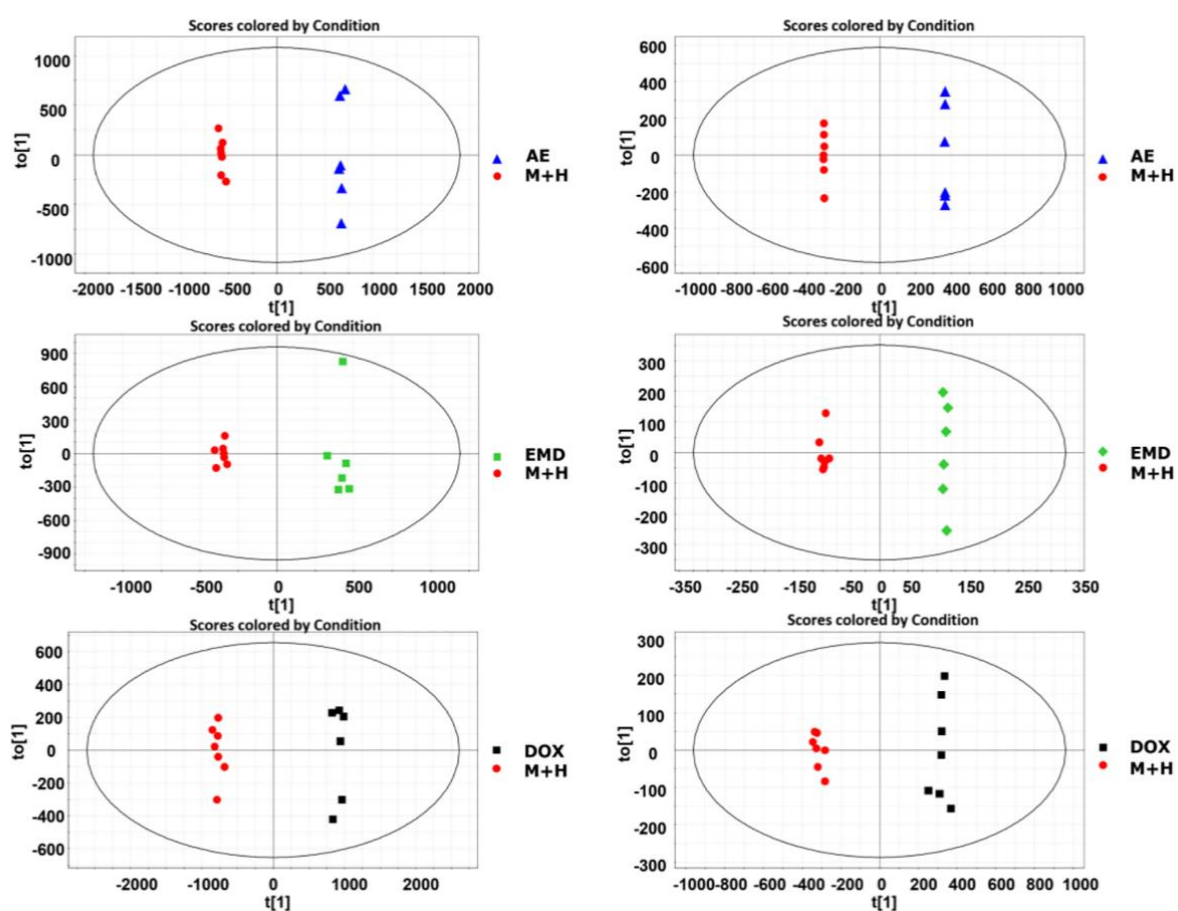

**Figure S5.** PLS-DA score plots of metabolic profiling between aloe emodin (AE)/emodin (EMD)/doxorubicin (DOX) and control group (M + H) in positive (left) and negative (right) ion modes.
